# Supplementary material for: Prevention of post-splenectomy sepsis in patients with asplenia - a study protocol of a controlled trial
Source: BMC Infect Dis. 2020 Jan 14;20:41. doi: 10.1186/s12879-019-4752-2 (PMC6961276; doi:10.1186/s12879-019-4752-2)
Supplement: Supplementary file 1 — Additional file 1. Medical Alert Card Asplenia. [file 12879_2019_4752_MOESM1_ESM.pdf]

Indikationsimpfungen bei Asplenie

| Datum | Pneumokokken |        | Meningokokken |          |       | Haemo-philus | Grippe | Unterschrift und Stempel |
|-------|--------------|--------|---------------|----------|-------|--------------|--------|--------------------------|
|       | PCV-13       | PPV-23 | MCV-C         | MCV-ACWY | Men-B |              |        |                          |
|       |              |        |               |          |       |              |        |                          |
|       |              |        |               |          |       |              |        |                          |
|       |              |        |               |          |       |              |        |                          |
|       |              |        |               |          |       |              |        |                          |
|       |              |        |               |          |       |              |        |                          |

Antibiotikaphylaxe

| Präparat | von | bis | Präparat | von | bis |
|----------|-----|-----|----------|-----|-----|
|          |     |     |          |     |     |
|          |     |     |          |     |     |

Für Abkürzungen siehe Impfplan auf der Rückseite

Im Auftrag und mit Unterstützung von:

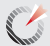

Deutsche Gesellschaft für Infektiologie

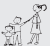

Deutsche Gesellschaft für Pädiatrische Infektiologie

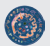

Deutsche Sepsisgesellschaft

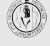

Deutsche Gesellschaft für Chirurgie

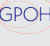

Gesellschaft für Pädiatrische Onkologie und Hämatologie

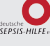

Deutsche Sepsis-Hilfe

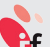

**Impressum**  
Abteilung Infektiologie, Klinik für Innere Medizin II  
und IFB-Zentrum Chronische Immundefizienz (CCI)  
Universitätsklinikum Freiburg  
Hugstetter Straße 55  
D-79106 Freiburg im Breisgau  
aspleniepass@asplenie-net.org  
www.asplenie-net.org

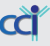

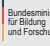

Gefördert vom Bundesministerium für Bildung und Forschung

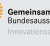

Gefördert durch  
Gemeinsamer Bundesausschuss  
Innovationsausschuss

4/2018

Bestellformulare: [www.asplenie-net.org](http://www.asplenie-net.org)

NOTFALLAUSWEIS

Medical Emergency Card Asplenia

Asplenie

(Fehlende Milz / Milzfunktion)

Es besteht ein erhöhtes Risiko für lebensbedrohliche Infektionen !

## Inhaber

|              |  |
|--------------|--|
| Name         |  |
| Vorname      |  |
| Geburtsdatum |  |
| Adresse      |  |

## Asplenie / Splenektomie

|           |  |
|-----------|--|
| seit / am |  |
|-----------|--|

## Im Notfall zu benachrichtigen

|         |  |
|---------|--|
| Name    |  |
| Telefon |  |

## Schwere Antibiotikaallergie

nein ☐ ja ☐

|                                           |  |
|-------------------------------------------|--|
| gegen                                     |  |
| Stempel des Hausarztes oder Kinderarztes: |  |

## Impfplan bei Asplenie

Bitte Aktualisierungen unter [www.asplenie-net.org](http://www.asplenie-net.org) beachten!

(Stand: 4 / 2018)

| Alter                                                                                                                           | Grundimmunisierung                                                                | 1. Auffrischimpfung                 | Weitere Auffrischimpfung     |
|---------------------------------------------------------------------------------------------------------------------------------|-----------------------------------------------------------------------------------|-------------------------------------|------------------------------|
| Pneumokokken                                                                                                                    |                                                                                   |                                     |                              |
| 2 Mo – 24 Mo.                                                                                                                   | gemäß Impfkalender STIKO                                                          | PSV-23 (nach 6-12 Mo.)              | PSV-23 (nach 5-6. J.) **     |
| 3-5 J.                                                                                                                          | PCV-13 *                                                                          | PSV-23 (im Alter von 6 J.)          | PSV-23 (nach 5-6. J.) **     |
| ≥6 J. u. Erwachsene                                                                                                             | 1 x PCV-13                                                                        | PSV-23 (nach 2-6 Mo.)               | PSV-23 (nach 5-6. J.) **     |
| * falls noch keine komplette Grundimmunisierung    ** Notwendigkeit von PCV-13 Wiederauffrischung derzeit noch unklar           |                                                                                   |                                     |                              |
| Meningokokken                                                                                                                   |                                                                                   |                                     |                              |
| 2-11 Mo.                                                                                                                        | 2 x Men-C (Abstand 2 Mo.)                                                         | Men-ACWY + (nach 12 Mo.)            | Men-ACWY (nach 6-12 Mo.) ++  |
| ≥ 1 J. u. Erwachsene                                                                                                            | 1 x Men-ACWY +                                                                    | Men-ACWY (nach 2 Mo.)               | Men-ACWY (alle 5 J.)         |
| + Zulassung beachten: Nimenrix® ab 2. Lebensjahr; Menveo® ab 3. Lebensjahr; ++ spätere Auffrischungen mit MCV-ACWY alle 5 J.    |                                                                                   |                                     |                              |
| 2-5 Mo.                                                                                                                         | 3 x Men-B † (Abstand 1 Mo.)                                                       | Men-B † (nach 12 Mo.)               | Notwendigkeit derzeit unklar |
| 6-23 Mo.                                                                                                                        | 2 x Men-B † (Abstand 2 Mo.)                                                       | Men-B † (Abstand s. u.) ††          |                              |
| 2-10 J.                                                                                                                         | 2 x Men-B † (Abstand 2 Mo.)                                                       |                                     |                              |
| ≥ 10 J. u. Erwachsene                                                                                                           | 2 x Men-B † (Abstand 2 Mo.)                                                       | Men-B (Abstand 4 Mo.) †††           |                              |
| † Zulassung beachten: Trumenba® erst ab 10 J. einsetzbar.                                                                       |                                                                                   |                                     |                              |
| †† Alter 6-11 Mo.: Auffrischung im 2. LJ (Abstand 2 Mo.), Alter 12-23 Mo.: Abstand 12 Mo.    ††† erforderlich nur für Trumenba® |                                                                                   |                                     |                              |
| Haemophilus influenzae Typ B                                                                                                    |                                                                                   |                                     |                              |
| 2 Mo.-5 J.                                                                                                                      | Grundimmunisierung gemäß Impfkalender STIKO                                       |                                     |                              |
| > 5 Jahre                                                                                                                       | Einmalige Impfung mit HiB-Konjugatimpfstoff                                       |                                     |                              |
| Influenza (Grippe)                                                                                                              |                                                                                   |                                     |                              |
| ≥ 2 Jahre                                                                                                                       | Jährliche Gripeschutzimpfung (aktuelle von der WHO empfohlene Antigenkombination) |                                     |                              |
| PCV-13                                                                                                                          | 13-valenter Pneumokokken-Konjugatimpfstoff                                        | Prevenar-13®                        |                              |
| PSV-23                                                                                                                          | 23-valenter Pneumokokken-Polysaccharidimpfstoff                                   | Pneumovax®                          |                              |
| Men-C                                                                                                                           | Meningokokken-Konjugatimpfstoff Serogruppe C                                      | Meningitec®, NeisVac-C®, Menjugate® |                              |
| Men-ACWY                                                                                                                        | Meningokokken-Konjugatimpfstoff Serogruppe A, C, W, Y                             | Menveo®, Nimenrix®                  |                              |
| Men-B                                                                                                                           | Meningokokken-Konjugatimpfstoff Serogruppe B                                      | Bexsero®, Trumenba®                 |                              |
| HiB                                                                                                                             | Haemophilus influenzae Typ B-Konjugatimpfstoff                                    | ACT-HiB® (nur über Import)          |                              |

## Notfallantibiotikatherapie – Optionen

|                                                                                                          |                                             |
|----------------------------------------------------------------------------------------------------------|---------------------------------------------|
| <b>bei Kindern</b>                                                                                       |                                             |
| p.o.                                                                                                     | Amoxicillin / Clavulansäure 3 x 25 mg/kg/KG |
| i.v.                                                                                                     | Ceftriaxon 1 x 80 mg/kg/KG                  |
| <b>bei Erwachsenen</b>                                                                                   |                                             |
| p.o.                                                                                                     | Amoxicillin / Clavulansäure 3 x 1000 mg     |
| i.v.                                                                                                     | Ceftriaxon 1 x 2000 mg                      |
| <b>bei Allergie</b>                                                                                      |                                             |
| Penicillinallergie                                                                                       | Cefpodoximproxetil                          |
| β-Laktamallergie                                                                                         | Clarithromycin                              |
| Empfehlungen zur Antibiotikaphylaxe siehe <a href="http://www.asplenie-net.org">www.asplenie-net.org</a> |                                             |

## Erhöhtes Infektionsrisiko

|                                                                                              |
|----------------------------------------------------------------------------------------------|
| <b>Sepsis mit bekapselten Bakterien: Pneumokokken (häufig), Meningokokken, H. influenzae</b> |
| <b>Sepsis nach Tierbissen: Capnocytophaga canimorsus</b>                                     |
| <b>Parasitosen: Babesia</b> (Zeckenstiche), Malaria                                          |

Bei Fieber oder Infektionszeichen ist eine schnelle Antibiotikatherapie angezeigt !
